# Supplementary material
Source: PubMed Central journal article supplement (PMC6726583)
Supplement: NIHMS1047169-supplement-Appendix.pdf [file NIHMS1047169-supplement-Appendix.pdf]

## Appendix: Co-location Review Search Methods

### Prevention Research Synthesis (PRS) Database

A cumulative database comprised of four automated searches in the following databases:

- Risk Reduction (RR) Search [1988 – 2015]
  1. MEDLINE (OVID)
  2. EMBASE (OVID)
  3. PsycINFO (OVID)
  4. Sociological Abstracts (ProQuest)
- Linkage to, Retention in, and Re-engagement to HIV Care (LRC) Search [1996 – 2015]
  1. MEDLINE (OVID)
  2. CINAHL (EBSCOhost)
  3. EMBASE (OVID)
  4. PsycINFO (OVID)
- Medication Adherence (MA) Search [1996 – 2015]
  1. MEDLINE (OVID)
  2. CINAHL (EBSCOhost)
  3. EMBASE (OVID)
  4. PsycINFO (OVID)
- Overview of Reviews Project (ORP) Search [1988 – 2015]
  1. MEDLINE (OVID)
  2. Cab Global Health (OVID)
  3. CINAHL (EBSCOhost)
  4. EMBASE (OVID)
  5. PsycINFO (OVID)
  6. Sociological Abstracts (ProQuest)

#### Notes:

- Each search update is implemented annually for the previous two years to cover publication lag.
- The four searches as implemented in MEDLINE (OVID) are provided in this appendix and the searches translated to the other databases are available from the corresponding author.
- The manual search for citations includes a hand search of journals with a high yield of subject specific citations, contacts in the field and reference list checks. Any 2016 publications in the database come from these manual searches.
- More information on the search methods for the Prevention Research Synthesis (PRS) database can be found here <http://www.cdc.gov/hiv/dhap/prb/prs/>

## RISK REDUCTION (RR) SEARCH STRATEGY – MEDLINE (OVID)

### Key:

\$ = truncation                      \* = focus  
ab = abstract                        ti = title  
/ut = utilization subheading    /pc = prevention  
and control subheading

### HIV/AIDS/STDs MESH

1.     \*HIV infections/pc
2.     \*Acquired Immunodeficiency Syndrome/pc
3.     \*Sexually Transmitted Diseases/pc
4.     \*Sexually Transmitted Diseases, bacterial/
5.     \*Sexually Transmitted Diseases, viral/
6.     AIDS Serodiagnosis/ut
7.     \*HIV Seropositivity/
  
8.     or/1-7

### PREVENTION/INTERVENTION/EVALUATION/EDUCATION MESH AND KEYWORDS

9.     Primary Prevention/
10.    Preventive Health Services/
11.    Health Promotion/
12.    Program Evaluation/
13.    Randomized Controlled Trials/
14.    Evaluation Studies/
15.    Contact Tracing/
16.    Case management/
17.    Needle-Exchange Programs/
18.    Intervention Studies/
19.    Follow-Up Studies/
20.    Longitudinal Studies/
21.    Multicenter Studies/
22.    Random Allocation/
23.    control group.ti,ab
24.    control trial.ti,ab
25.    controlled trial.ti,ab
26.    (rct or rcts).ti,ab
27.    case management.ti,ab
28.    contact tracing.ti,ab
29.    (counseling or counselling).ti,ab
30.    (detox or detoxification).ti,ab

31.    (drug\$ adj4 treatment\$.ti,ab
32.    education\$.ti,ab
33.    (effect or effects or effective or effectiveness).ti,ab
34.    efficacy.ti,ab
35.    evaluation\$.ti,ab
36.    impact\$.ti,ab
37.    intervention\$.ti,ab
38.    needle exchange\$.ti,ab
39.    network\$.ti,ab
40.    outreach\$.ti,ab
41.    partner notification.ti,ab
42.    (partner\$ adj4 contact\$ adj4 referral\$.ti,ab
43.    (notif\$ adj4 partner\$.ti,ab
44.    prevention\$.ti,ab
45.    program\$.ti,ab
46.    random\$.ti,ab
47.    rehab\$.ti,ab
48.    skill\$.ti,ab
49.    syringe exchange\$.ti,ab
50.    methadone.ti,ab
51.    test\$.ti,ab
52.    training.ti,ab
53.    trial\$.ti,ab
  
54.    or/9-53

### BEHAVIOR/OUTCOMES MESH AND KEYWORDS

55.    Behavior/
56.    Behavior Therapy/
57.    Health Behavior/
58.    Risk Reduction Behavior/
59.    Risk-Taking/
60.    Contraception Behavior/
61.    Coitus/
62.    Sexual Abstinence/
63.    Sexual Behavior/
64.    Sexual Partners/
65.    Safe Sex/
66.    Unsafe sex/
67.    Heroin Dependence/pc
68.    Needle Sharing/
69.    Condoms/ut
70.    Condoms, female/ut
71.    Contraceptive devices, male/ut
72.    Contraceptive devices, female/ut
73.    Substance abuse, intravenous/pc

- |                                                                                                                                                                                                                                                                                                                                                                                                                                                                                                                                                                                                                                                                                                                                                                                                                                                                                                                                                                                                                                                                                                                                                                                                                                                                                                                                                                          |                                                                                                                                                                                                                                                                                                                                                                                         |
|--------------------------------------------------------------------------------------------------------------------------------------------------------------------------------------------------------------------------------------------------------------------------------------------------------------------------------------------------------------------------------------------------------------------------------------------------------------------------------------------------------------------------------------------------------------------------------------------------------------------------------------------------------------------------------------------------------------------------------------------------------------------------------------------------------------------------------------------------------------------------------------------------------------------------------------------------------------------------------------------------------------------------------------------------------------------------------------------------------------------------------------------------------------------------------------------------------------------------------------------------------------------------------------------------------------------------------------------------------------------------|-----------------------------------------------------------------------------------------------------------------------------------------------------------------------------------------------------------------------------------------------------------------------------------------------------------------------------------------------------------------------------------------|
| <p>74. Substance-related disorders/pc<br/> 75. Cocaine-related disorders/pc<br/> 76. Health services/ut<br/> 77. heroin.ti,ab<br/> 78. cocaine.ti,ab<br/> 79. opiate\$.ti,ab<br/> 80. opium.ti,ab<br/> 81. paraphernalia.ti,ab<br/> 82. (treatment\$ adj2 entry).ti,ab<br/> 83. (treatment\$ adj2 enter\$).ti,ab<br/> 84. (abstin\$ or abstain\$).ti,ab<br/> 85. drug\$.ti,ab<br/> 86. substance.ti,ab<br/> 87. (idu or idus or ivdu or ivdus).ti,ab<br/> 88. ((behavior\$ or behaviour\$ or activit\$<br/> or access\$ or utiliz\$ or use\$ or<br/> using\$ or test\$ or risk\$ or outcome\$)<br/> adj4 (reduc\$ or declin\$ or chang\$ or<br/> effect\$ or increas\$ or decreas\$ or<br/> impact\$ or modif\$ or lower\$ or<br/> maintain\$ or maintenance)).ti,ab<br/> 89. bleach\$.ti,ab<br/> 90. clean\$.ti,ab<br/> 91. condom\$.ti,ab<br/> 92. contracept\$.ti,ab<br/> 93. crack\$.ti,ab<br/> 94. disclos\$.ti,ab<br/> 95. incidence.ti,ab<br/> 96. inject\$.ti,ab<br/> 97. intention\$.ti,ab<br/> 98. intercourse.ti,ab<br/> 99. needle\$.ti,ab<br/> 100. infect\$ adj4 (new\$ or rate\$ or<br/> declin\$ or reduc\$ or prevent\$ or<br/> lower\$ or decreas\$).ti,ab<br/> 101. partner\$.ti,ab<br/> 102. seroconver\$.ti,ab<br/> 103. sex\$.ti,ab<br/> 104. syring\$.ti,ab<br/> 105. test\$.ti,ab<br/> <br/> 106. or/55-105<br/> <br/> 107. 8 and 54 and 106</p> | <p>Clinical Trial, Controlled Clinical Trial,<br/> Corrected and Republished Article,<br/> Evaluation Studies, Journal Article, Meta-<br/> Analysis, Multicenter Study, Practice<br/> Guideline, Published Erratum, Randomized<br/> Controlled Trial, Retraction of Publication,<br/> Review, Review Literature, Systematic<br/> Reviews, Technical Report, Validation<br/> Studies</p> |
|--------------------------------------------------------------------------------------------------------------------------------------------------------------------------------------------------------------------------------------------------------------------------------------------------------------------------------------------------------------------------------------------------------------------------------------------------------------------------------------------------------------------------------------------------------------------------------------------------------------------------------------------------------------------------------------------------------------------------------------------------------------------------------------------------------------------------------------------------------------------------------------------------------------------------------------------------------------------------------------------------------------------------------------------------------------------------------------------------------------------------------------------------------------------------------------------------------------------------------------------------------------------------------------------------------------------------------------------------------------------------|-----------------------------------------------------------------------------------------------------------------------------------------------------------------------------------------------------------------------------------------------------------------------------------------------------------------------------------------------------------------------------------------|

**No Language Limit**

**Year limits** (1988 – 2015)

**Publication limits:**

## Linkage to, Retention in, and Re-engagement in HIV Care (LRC) Search Strategy MEDLINE (OVID)

Key:

\$ = truncation

ab = abstract

ti = title

### Subheadings

/co = complications sh /dt = drug therapy

/di = diagnosis sh /nu = nursing sh

/pc = prevention and control /px = psychology

/th = therapy /tm =transmission

### HIV/HIV POSITIVE PERSON MESH AND KEYWORDS

1. HIV infections/co, dt, di, nu, pc, px, th, tm
2. HIV infect\$.ti,ab
3. (HIV adj4 diagnos\$).ti,ab
4. HIV positiv\$.ti,ab
5. (HIV adj4 care).ti,ab
6. (HIV adj4 treatment\$).ti,ab
7. living with HIV.ti,ab
8. or/1-7

### LINKING AND RETENTION IN CARE MESH AND KEYWORDS

9. (access\$ adj4 care).ti,ab
10. (access\$ adj4 barrier\$).ti,ab
11. (access\$ adj4 (treatment or service\$)).ti,ab
12. (barrier\$ adj4 care).ti,ab
13. case management.ti,ab
14. case manager\$.ti,ab
15. (decreas\$ adj4 barrier\$).ti,ab
16. (engag\$ adj4 (care or service\$)).ti,ab
17. (enroll\$ adj4 care).ti,ab
18. ((enter\$ or entry) adj4 care).ti,ab
19. ((enter\$ or entry) adj4 service\$).ti,ab
20. (improv\$ adj4 access\$).ti,ab
21. (improv\$ adj4 retention).ti,ab
22. ((kept or keep\$ or return\$) adj4 appointment\$).ti,ab
23. (link\$ adj4 (retain\$ or retent\$)).ti,ab
24. (link\$ adj4 care).ti,ab
25. (link\$ adj4 case).ti,ab
26. (link\$ adj4 treatment).ti,ab
27. (link\$ adj4 service\$).ti,ab

28. (outreach adj4 (care or link\$ or program\$)).ti,ab
29. ((provision or provid\$) adj4 (care or service\$)).ti,ab
30. (reduc\$ adj4 barrier\$).ti,ab
31. ((re engag\$ or reengag\$) adj4 (care or treatment or service\$)).ti,ab
32. ((re enter\$ or reenter\$) adj4 (care or treatment or service\$)).ti,ab
33. ((refer or refers or referred or referral\$) adj4 (care or medical or treatment or clinic or service\$)).ti,ab
34. ((retain\$ or retent\$) adj4 care).ti,ab
35. (seek\$ adj4 (care or treatment\$)).ti,ab
36. (utiliz\$ adj4 (treatment or care or service\$)).ti,ab
37. ((medical) adj4 (care or treatment or service\$)).ti,ab
38. (gap\$ adj2 care).ti,ab
39. (visit adj2 (constan\$ or consist\$)).ti,ab
40. (appointment\$ adj2 adher\$).ti,ab
41. ((follow-up or follow up) adj2 discontin\$).ti,ab
42. ((miss\$ or schedul\$) adj2 (visit\$ or appointment\$)).ti,ab
43. (\$contin\$ adj2 care).ti,ab
44. or/9-43
45. 8 and 44

### No Language Limit

Year limits (1996 – 2015)

### Publication limits:

Clinical Trial, Controlled Clinical Trial, Corrected and Republished Article, Evaluation Studies, Journal Article, Meta-Analysis, Multicenter Study, Published Erratum, Randomized Controlled Trial, Retraction of Publication, Review, Review Literature, Technical Report, Validation Studies

## Medication Adherence (MA) Search Strategy MEDLINE (OVID)

### Key:

/ = Index Term

\$ = truncation

ab = abstract

ti = title

adj2 = within 2 words

adj4 = within 4 words

### HIV/AIDS MeSH and Keywords

1. HIV Infections/
2. AIDS/
3. HIV Seropositivity/
4. (living adj4 (hiv or aids)).ti,ab
5. HIV positiv\$.ti,ab
6. HIV infected.ti,ab

7. or/1-6

### Intervention MeSH and Keywords

8. Intervention Studies/
9. Case management/
10. Directly Observed Therapy/
11. intervention\$.ti,ab
12. (therapy or therapies).ti,ab
13. (treatment or treatments).ti,ab
14. medication event monitor\$.ti,ab
15. mems.ti,ab
16. modified directly observed.ti,ab
17. mdot.ti,ab
18. directly administered.ti,ab
19. daart.ti,ab
20. directly observed therapy.ti,ab
21. dot.ti,ab

22. or/8-21

### HAART MeSH and Keywords

23. Anti-HIV agents/
24. Anti-Retroviral Agents/
25. Antiviral Agents/
26. Antiretroviral Therapy, Highly Active/
27. haart.ti,ab
28. arv.ti,ab
29. art.ti,ab
30. antiretroviral\$.ti,ab
31. anti retroviral\$.ti,ab

32. antiviral\$.ti,ab
33. anti viral\$.ti,ab
34. (medication or medications).ti,ab

35. or/23-34

### Adherence MeSH and Keywords

36. Patient Compliance/
37. Medication Adherence/
38. adher\$.ti,ab
39. nonadher\$.ti,ab
40. non adher\$.ti,ab
41. complian\$.ti,ab
42. non complian\$.ti,ab
43. noncomplian\$.ti,ab
44. viral load.ti,ab
45. (cd4 adj2 (count or counts)).ti,ab

46. or/36-45

47. 7 and 22 and 35 and 46

### No Language Limit

Year limits (1996 – 2015)

### Publication limits:

Clinical Trial, Controlled Clinical Trial, Corrected and Republished Article, Evaluation Studies, Journal Article, Meta-Analysis, Multicenter Study, Practice Guideline, Published Erratum, Randomized Controlled Trial, Retraction of Publication, Review, Review Literature, Systematic Reviews, Technical Report, Validation Studies

## Overview of Reviews (ORP) Search Strategy MEDLINE (OVID)

Key:

\* = focus MeSH term

adj = adjacency search

ti = title

ab = abstract

pt = publication type

/ = MeSH ter

\$ = truncation

### HIV/AIDS /STD MESH AND KEYWORDS

1. \*HIV infections/
2. \*AIDS/
3. \*Sexually transmitted diseases/
4. \*HIV Seropositivity/
5. \*AIDS Serodiagnosis/
6. HIV infect\$.ti,ab
7. HIV positiv\$.ti,ab
8. HIV care.ti,ab
9. (HIV adj4 incidence).ti,ab
10. (HIV adj4 prevent\$.ti,ab
11. (HIV adj4 risk\$.ti,ab
12. (HIV adj4 prevalen\$.ti,ab
13. (HIV adj4 new\$ infect\$.ti,ab
14. (HIV adj4 new\$ diagnos\$.ti,ab
15. (HIV adj4 transm\$.ti,ab
16. Sexually transmitted disease\$.ti,ab
17. Sexually transmitted infection\$.ti,ab
18. (STD or STDs or STI or STIs).ti,ab
19. (living adj4 HIV).ti,ab
20. (living adj4 (AIDS not hearing)).ti,ab

21. or/1-20

### SYSTEMATIC REVIEW MESH AND KEYWORDS

22. Review/ OR Review.pt (Same Search)

23. Meta Analysis/ OR Meta-Analysis.pt

24. 22 OR 23

25. (MEDLINE or MEDLARS or EMBASE or PubMed or Cochrane).ab

26. (PsychINFO or PsycINFO).ab

27. (Sociofile or Sociological Abstracts).ab

28. CINAHL.ab

29. ((hand adj2 search\$) or (manual\$ adj2 search\$)).ab

30. ((electronic or bibliographic or computer\$ or online or automat\$) adj3 database\$.ab

31. or/25-30

32. 24 and 31

33. (meta-anal\$ or meta anal\$ or metaanal\$.ti,ab

34. (systematic\$ adj4 review\$.ti,ab

35. (systematic\$ adj4 overview\$.ti,ab

36. (systematic\$ adj4 synthes\$.ti,ab

37. literature review.ti,ab

38. (literature\$ adj4 overview\$.ti,ab

39. (literature\$ adj4 synthes\$.ti,ab

40. (quantitativ\$ adj4 review\$.ti,ab

41. (quantitativ\$ adj4 overview\$.ti,ab

42. (quantitativ\$ adj4 synthes\$.ti,ab

43. (qualitative\$ adj4 review\$.ti,ab

44. (qualitative\$ adj4 overview\$.ti,ab

45. (qualitative\$ adj4 synthes\$.ti,ab

46. (methodolog\$ adj4 review\$.ti,ab

47. (methodolog\$ adj4 overview\$.ti,ab

48. (methodolog\$ adj4 synthes\$.ti,ab

49. (review\$ adj4 article\$.ti,ab

50. (review\$ adj4 (study or studies)).ti,ab

51. (review\$ adj4 evidence).ti,ab

52. (review\$ adj4 updat\$.ti,ab

53. (review\$ adj4 (analy\$ or anali\$)).ti,ab

54. (research adj4 review\$.ti,ab

55. (research adj4 overview\$.ti,ab

56. (research adj4 synthes\$.ti,ab

57. or/33-56

58. 32 or 57

59. 21 and 58

### No Language Limit

Year limits (1988 – 2015)

### Publication limits:

Clinical Trial, Controlled Clinical Trial, Corrected and Republished Article, Evaluation Studies, Journal Article, Meta-Analysis, Multicenter Study, Practice Guideline, Published Erratum, Randomized Controlled Trial, Retraction of Publication, Review, Review Literature, Systematic Reviews, Technical Report, Validation Studies

## Co-Location Query in the PRS Database

Last Run: April 2016

Keyword search in the title, abstract, and keywords of all citations in the database. Terms have been truncated to capture variations in the use of a prefix and suffix on the terms.

[one-stop shopping] OR [one-stop-shopping] OR [one stop shopping] OR [co-locat] OR [colocat] OR [coordinate service] OR [coordinates service] OR [coordinated service] OR [coordinating service] OR [service coordinat] OR [services coordinat] OR [coordinate care] OR [coordinates care] OR [coordinated care] OR [coordinating care] OR [care coordinat] OR [service integrat] OR [services integrat] OR [integrate treatment] OR [integrates treatment] OR [integrated treatment] OR [integrating treatment] OR [treatment integrat] OR [treatments integrat] OR [integrate service] OR [integrates service] OR [integrated service] OR [integrating service] OR [integrate program] OR [integrated program] OR [care integrat] OR [integrate care] OR [integrates care] OR [integrated care] OR [integrating care] OR [integrate HIV] OR [integrates HIV] OR [integrated HIV] OR [integrating HIV] OR [systems of health care delivery] OR [models of health services delivery] OR [systems of service delivery] OR [integrated service delivery] OR [delivery of health care] OR [delivery of health service] OR [multidisciplinary] OR [multi-disciplinary] OR [on-site] OR [onsite] OR [centraliz] OR [centralis] OR [comprehensive service] OR [comprehensive care] OR [service delivery] OR [integrate ART] OR [integrated ART] OR [integrates ART] OR [integration ART] OR [integrating ART] [ART integrate] OR [ART integrated] OR [ART integrates] OR [ART integration] OR [ART integrating]
